# Supplementary material for: Evaluation of Antibiotic Resistance of Salmonella Serotypes and Whole-Genome Sequencing of Multiresistant Strains Isolated from Food Products in Russia
Source: MDPI journal article supplement (doi:10.3390/antibiotics11010001), 2021-12-21
Supplement: s1 [file s1]

Supplementary Table S1. Sequencing statistics

| Strain | Illumina MiSeq |                          | MinION |                          |
|--------|----------------|--------------------------|--------|--------------------------|
|        | Reads          | Average read length (nt) | Reads  | Average read length (nt) |
| SZL 30 | 2482884        | 247                      | 165065 | 6748                     |
| SZL 31 | 2324028        | 259                      | 68614  | 6897                     |
| SZL 38 | 3294864        | 251                      | 126596 | 7217                     |

Supplementary Table S2. Pathogenicity Islands identified in the genomes of *Salmonella* strains.

| SPI   | Reference Strain   |                     |             | SZL 30              |                                                        | SZL 31              |                                                        | SZL 38              |                                        |
|-------|--------------------|---------------------|-------------|---------------------|--------------------------------------------------------|---------------------|--------------------------------------------------------|---------------------|----------------------------------------|
|       | Serotype           | Positon             | Length (bp) | Positon             | Length (bp)<br>(Cowerage/<br>Identity)                 | Positon             | Length (bp)<br>(Cowerage/<br>Identity)                 | Positon             | Length (bp)<br>(Cowerage/<br>Identity) |
| SPI-1 | Typhimurium<br>LT2 | 3005849–<br>3048153 | 42305       | 2217896-<br>2260201 | 42306<br>(100/99)                                      | 1255831-<br>1298136 | 42306<br>(100/99)                                      | 4145862-<br>4188166 | 42305<br>(100/100)                     |
| SPI-2 | Typhimurium<br>LT2 | 1461731–<br>1501480 | 39750       | 746128-<br>785876   | 39749<br>(100/99)                                      | 2730163-<br>2769911 | 39749<br>(100/99)                                      | 889254-<br>929780   | 40527<br>(100/100)                     |
| SPI-3 | Typhimurium<br>LT2 | 3948999–<br>3985278 | 36280       | 3185282-<br>3216330 | 31049<br>(89/99)<br>Missing<br>genes:<br>sugR,<br>rhuM | 300371-<br>331419   | 31049<br>(89/99)<br>Missing<br>genes:<br>sugR,<br>rhuM | 3334755-<br>3370950 | 36196<br>(100/100)                     |
| SPI-4 | Typhimurium<br>LT2 | 4477865–<br>4501275 | 23411       | 3727088-<br>3750496 | 23409<br>(100/98)                                      | 4454845-<br>4479318 | 24438<br>(100/98)                                      | 2819065-<br>2842467 | 23403<br>(100/100)                     |
| SPI-5 | Typhimurium<br>LT2 | 1175536–<br>1182100 | 6565        | 464191-<br>470845   | 6655<br>(100/99)                                       | 3045194-<br>3051848 | 6655<br>(100/99)                                       | 1209140-<br>1215792 | 6652<br>(100/100)                      |
| SPI-6 | Typhimurium        | 304666–             | 46693       | 4375990-            | 57525                                                  | 3771823-            | 57525                                                  | 2030954-            | 46662                                  |

|        |                    |                     |        |                      |                                                                                             |                     |                                                                                             |                     |                    |
|--------|--------------------|---------------------|--------|----------------------|---------------------------------------------------------------------------------------------|---------------------|---------------------------------------------------------------------------------------------|---------------------|--------------------|
|        | LT2                | 351358              |        | 4433514              | (80/98)<br>Missing<br>genes: SirA,<br>STM0275,<br>STM0287,<br>STM0289-<br>STM0294,<br>safA, | 3829347             | (80/98)<br>Missing<br>genes: SirA,<br>STM0275,<br>STM0287,<br>STM0289-<br>STM0294,<br>safA, | 2077615             | 100/100            |
| SPI-7  | Typhi CT18         | 4409652–<br>4542913 | 133262 | -                    | -                                                                                           | -                   | -                                                                                           | -                   | -                  |
| SPI-8  | Typhi CT18         | 3132530–<br>3139414 | 6885   | -                    | -                                                                                           | -                   | -                                                                                           | -                   | -                  |
| SPI-9  | Typhi CT18         | 2743495–<br>2759190 | 15696  | 2097987-<br>2114283  | 16297<br>(100/98)                                                                           | 1401753-<br>1418049 | 16297<br>(100/98)                                                                           | 4520533-<br>4536829 | 16297<br>(100/99)  |
| SPI-10 | Typhi CT18         | 4683605–<br>4716538 | 32934  | -                    | -                                                                                           | -                   | -                                                                                           | -                   | -                  |
| SPI-11 | Typhimurium<br>LT2 | 1326065–<br>1334385 | 8321   | 613022-<br>621331    | 8310<br>(100/99)                                                                            | 2894708-<br>2903017 | 8310<br>(100/99)                                                                            | 1057126-<br>1065446 | 8321<br>(100/100)  |
| SPI-12 | Typhimurium<br>LT2 | 2330960–<br>2345977 | 15018  | 1611395-<br>1616573  | 5179<br>(34/99)<br>Missing<br>genes: ssrB,<br>oafA,<br>STM2233 -<br>STM2240                 | 1899462-<br>1904640 | 5179<br>(34/99)<br>Missing<br>genes: ssrB,<br>oafA,<br>STM2233 -<br>STM2240                 | 4658-<br>19668      | 15011<br>(100/100) |
| SPI-13 | Typhimurium<br>LT2 | 3276387–<br>3301691 | 25305  | 2516654 -<br>2541953 | 25300<br>(100/99)                                                                           | 974751-<br>1000050  | 25300<br>(100/99)                                                                           | 4415550-<br>4440854 | 25305<br>(100/100) |
| SPI-14 | Typhimurium<br>LT2 | 926180–<br>933609   | 7430   | 303154 -<br>310583   | 7430<br>(100/100)                                                                           | 3205457-<br>3212886 | 7430<br>(100/100)                                                                           | 1407105-<br>1414534 | 7430<br>(100/100)  |
| SPI-15 | Typhi CT18         | 3054094–<br>3059809 | 5716   | -                    | -                                                                                           | -                   | -                                                                                           | -                   | -                  |
| SPI-16 | Typhimurium        | 613596–             | 4130   | 14918-               | 1265<br>(31/100)                                                                            | 3499866-            | 1265<br>(31/100)                                                                            | 1724278-<br>1728407 | 4130<br>(100/100)  |

|        |                                 |                     |        |                     |                             |                     |                             |                     |                    |
|--------|---------------------------------|---------------------|--------|---------------------|-----------------------------|---------------------|-----------------------------|---------------------|--------------------|
|        | LT2                             | 617725              |        | 16182               | Missing<br>gene:<br>STM0557 | 3501130             | Missing<br>gene:<br>STM0557 |                     |                    |
| SPI-17 | Typhi CT18                      | 2461018–<br>2465128 | 4111   | -                   | -                           | -                   | -                           | -                   | -                  |
| SPI-18 | Typhi CT18                      | 1455055–<br>1456801 | 1747   | -                   | -                           | -                   | -                           | -                   | -                  |
| SPI-19 | Dublin<br>CT_02021853           | 1203281–<br>1239108 | 35828  | -                   | -                           | -                   | -                           | -                   | -                  |
| SPI-20 | Arizonae<br>62:z4,z23           | 2617493–<br>2651483 | 33991  | -                   | -                           | -                   | -                           | -                   | -                  |
| SPI-21 | Arizonae<br>62:z4,z23           | 2504768–<br>2560524 | 55757  | -                   | -                           | -                   | -                           | -                   | -                  |
| SPI-22 | Bongori NCTC<br>12419           | 1349885–<br>1369393 | 19,509 | -                   | -                           | -                   | -                           | -                   | -                  |
| SPI-23 | Derby 07CR553<br>LAZB01000005.1 | 1197720–<br>1161181 | 36540  | -                   | -                           | -                   | -                           | -                   | -                  |
| CS54   | Typhimurium<br>AF140550.2       | 1-25252             | 25252  | 1946303–<br>1971555 | 25253<br>(100/97)           | 1544478–<br>1569730 | 25253<br>(100/97)           | 4750278–<br>4775529 | 25252<br>(100/100) |

Supplementary Table S3. Prophages identified in the genomes of *Salmonella* strains.

| Strain | Prophage | Completeness | Location   | Position        | Length,<br>(kb) | The most similar<br>Sequence NCBI<br>GenBank<br>(Coverage/Identity, %) |
|--------|----------|--------------|------------|-----------------|-----------------|------------------------------------------------------------------------|
| SZL 30 | S30-1    | intact       | chromosome | 1775254-1823074 | 47.8            | CP052817.1 (84/98)                                                     |
|        | S30-2    | intact       | chromosome | 1244270-1276312 | 32              | CP052817.1 (100/100)                                                   |
|        | S30-3    | intact       | chromosome | 3505067-3527042 | 21.9            | CP052817.1 (100/100)                                                   |
|        | S30-4    | intact       | pSZL30.1   | 23035-35898     | 12.8            | CP052818.1 (100/100)                                                   |
|        | S30-5    | questionable | chromosome | 2114772-2124257 | 9.4             | CP052817.1 (100/100)                                                   |
|        | S30-6    | incomplete   | chromosome | 3666982-3687422 | 20.4            | CP052817.1 (100/100)                                                   |
|        | S30-13   | incomplete   | pSZL30.2   | 16350-32841     | 16.4            | CP027138.1 (77/100)                                                    |
|        | S30-7    | incomplete   | chromosome | 1368812-1383062 | 14.2            | CP052817.1 (100/100)                                                   |

|        |        |              |            |                 |      |                      |
|--------|--------|--------------|------------|-----------------|------|----------------------|
|        | S30-11 | incomplete   | pSZL30.1   | 100316-113967   | 13.6 | CP040066.1 (93/100)  |
|        | S30-8  | incomplete   | chromosome | 7926-18526      | 10.6 | CP052817.1 (100/100) |
|        | S30-9  | incomplete   | chromosome | 1754042-1762443 | 8.4  | CP052817.1 (100/100) |
|        | S30-10 | incomplete   | chromosome | 2259677-2267561 | 7.8  | CP052817.1 (100/100) |
|        | S30-14 | incomplete   | pSZL30.2   | 7049-14803      | 7.7  | CP027138.1 (87/100)  |
|        | S30-12 | incomplete   | pSZL30.1   | 241247-248518   | 7.2  | CP052818.1 (100/100) |
| SZL 31 | S31-1  | intact       | chromosome | 1683139-1740779 | 57.6 | CP052817.1 (86/98)   |
|        | S31-2  | intact       | chromosome | 2239713-2271755 | 32   | CP052817.1 (100/100) |
|        | S31-4  | intact       | pSZL31.1   | 31848-59439     | 27.5 | CP052817.1 (100/100) |
|        | S31-3  | intact       | chromosome | 300-24896       | 24.5 | CP052818.1 (100/100) |
|        | S31-5  | questionable | chromosome | 1382924-1401553 | 18.6 | CP052817.1 (100/100) |
|        | S31-6  | incomplete   | chromosome | 4518984-4539424 | 20.4 | CP052817.1 (100/100) |
|        | S31-7  | incomplete   | chromosome | 2131116-2146365 | 15.2 | CP052817.1 (100/100) |
|        | S31-10 | incomplete   | chromosome | 1242351-1256355 | 14.0 | CP052817.1 (100/100) |
|        | S31-13 | incomplete   | pSZL31.2   | 35434-47689     | 12.2 | CP027138.1 (81/100)  |
|        | S31-8  | incomplete   | chromosome | 3497522-3508122 | 10.6 | CP052817.1 (100/100) |
|        | S31-9  | incomplete   | chromosome | 1753590-1761991 | 8.4  | CP052817.1 (100/100) |
|        | S31-11 | incomplete   | pSZL31.1   | 248954-256853   | 7.9  | CP040066.1 (100/100) |
|        | S31-12 | incomplete   | pSZL31.1   | 106784-114055   | 7.2  | CP052818.1 (100/100) |
| SZL 38 | S38-6  | intact       | pSZL38.1   | 517-79223       | 78.7 | CP019188.1 (85/99)   |
|        | S38-1  | intact       | chromosome | 1964077-2024744 | 60.6 | CP050130.1 (100/100) |
|        | S38-2  | intact       | chromosome | 256927-314956   | 58   | CP050726.1(100/100)  |
|        | S38-3  | intact       | chromosome | 4624695-4670730 | 46   | CP050726.1(100/100)  |
|        | S38-4  | intact       | chromosome | 1247306-1286603 | 39.2 | CP050726.1(100/100)  |
|        | S38-5  | intact       | chromosome | 4556354-4593542 | 37.1 | CP014659.2 (97/97)   |
|        | S38-7  | questionable | chromosome | 4514613-4558033 | 43.4 | CP053294.1 (100/100) |
|        | S38-8  | questionable | chromosome | 3959980-3998256 | 38.2 | CP050726.1(100/100)  |
|        | S38-9  | questionable | chromosome | 418957-432910   | 13.9 | CP050726.1(100/100)  |
|        | S38-10 | incomplete   | chromosome | 3384024-3410360 | 26.3 | CP043667.1 (99/99)   |
|        | S38-11 | incomplete   | chromosome | 2881990-2902409 | 20.4 | CP050726.1(100/100)  |
|        | S38-12 | incomplete   | chromosome | 4910546-4919658 | 9.1  | CP050726.1(100/100)  |
|        | S38-13 | incomplete   | chromosome | 1356664-1363708 | 7.0  | CP050726.1(100/100)  |
